# Supplementary material for: An evolutionary ratchet leading to loss of elongation factors in eukaryotes
Source: PubMed Central journal article supplement (PMC3938643; doi:10.1186/1471-2148-14-35), 2014-02-24

# Additional file 2 Figure S1

**A**

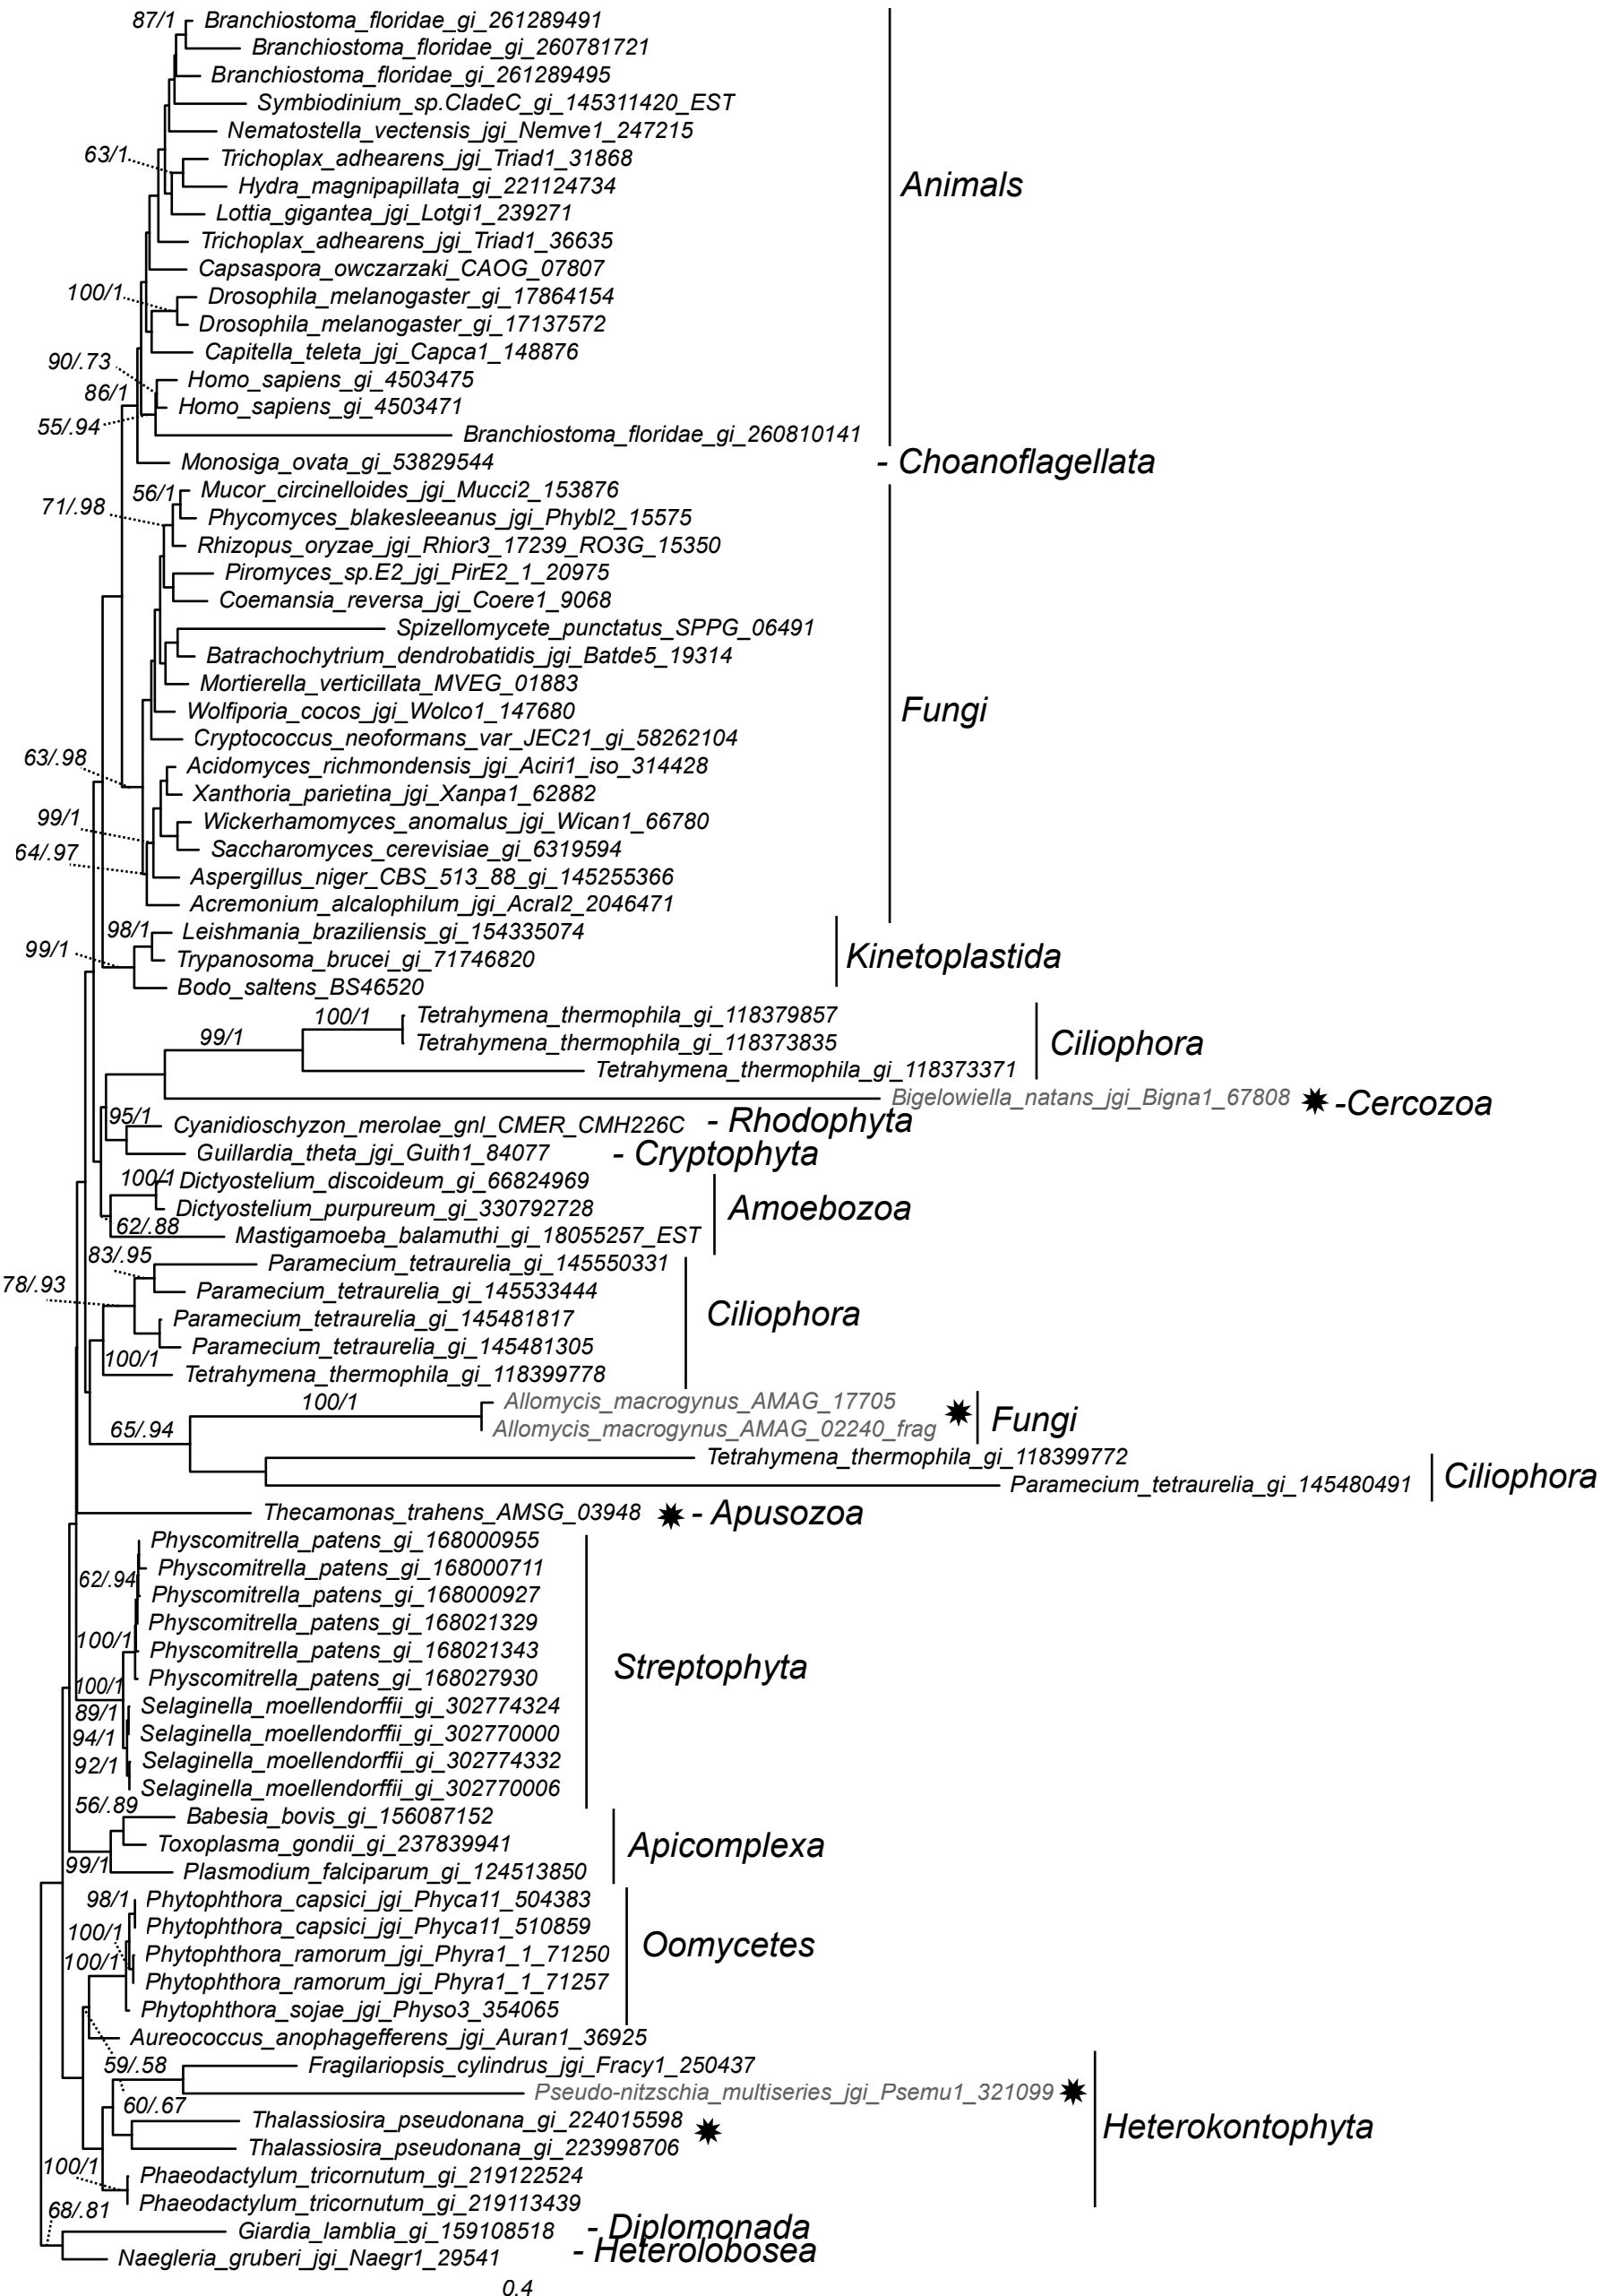

**B**

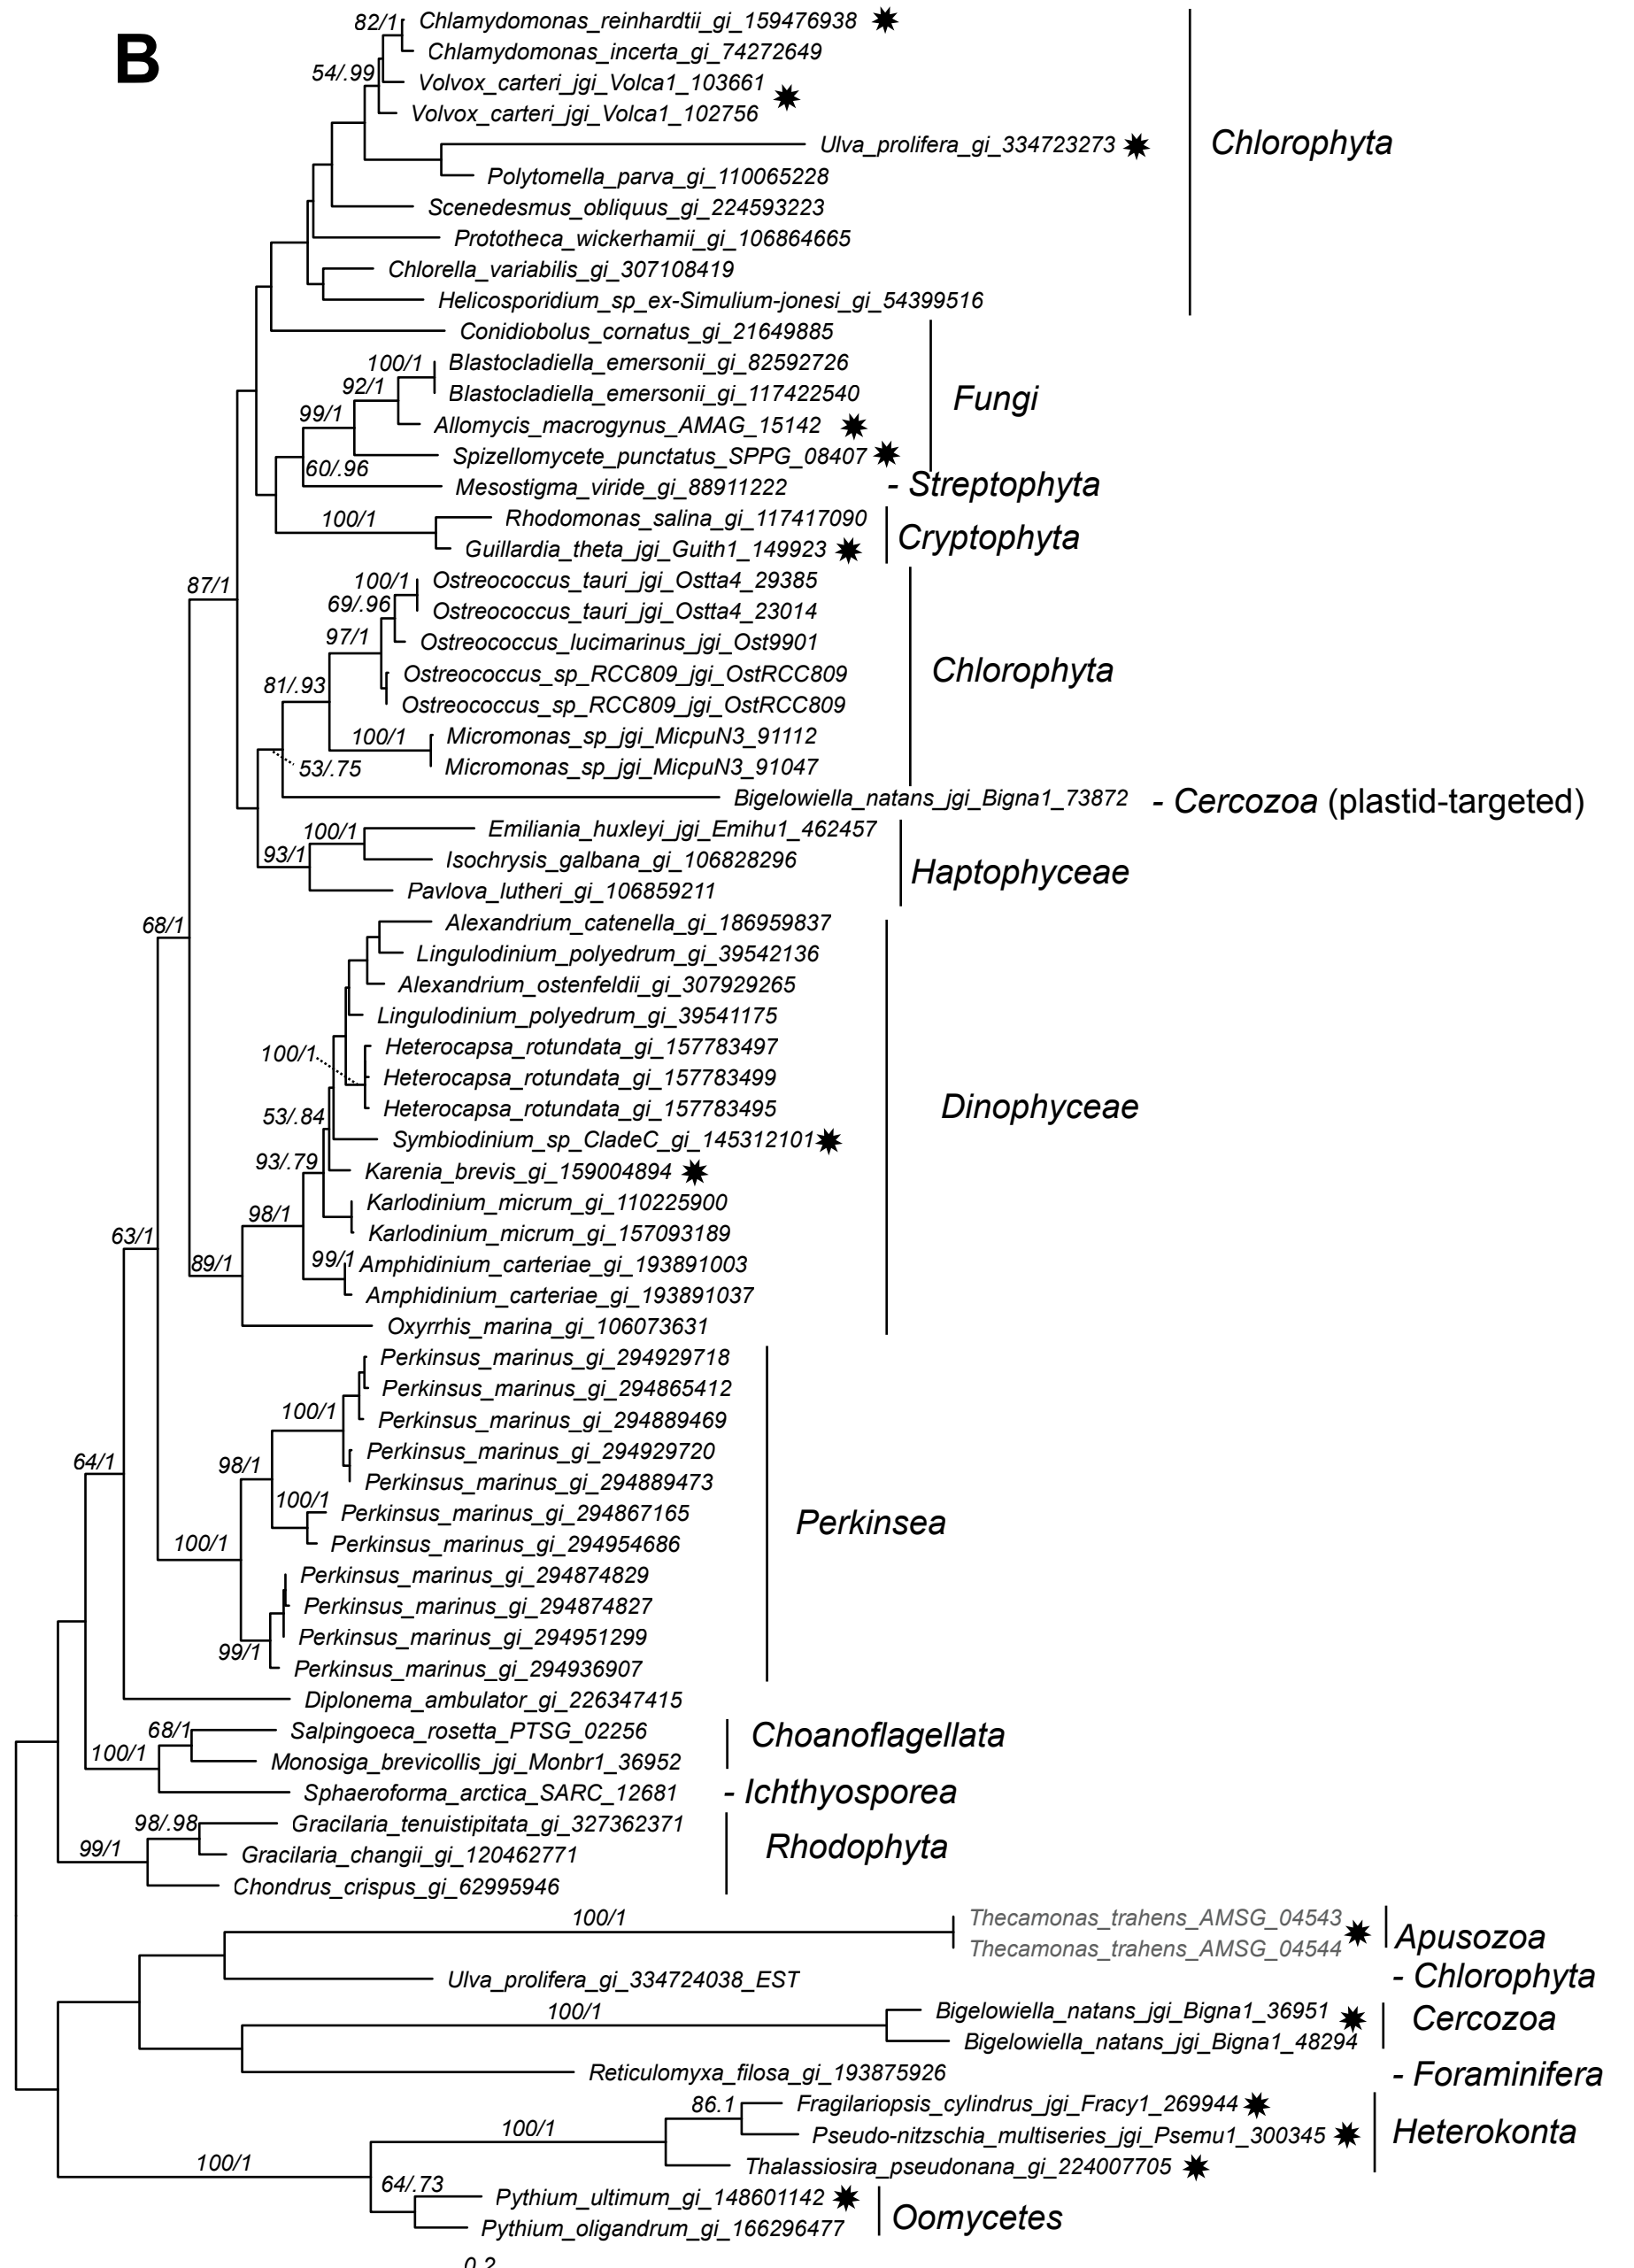

Supplement: 1471-2148-14-35-S2.pdf [file 1471-2148-14-35-S2.pdf]
