# Supplementary material for: An evolutionary ratchet leading to loss of elongation factors in eukaryotes
Source: PubMed Central journal article supplement (PMC3938643; doi:10.1186/1471-2148-14-35), 2014-02-24

**A**

TEF1 EFL

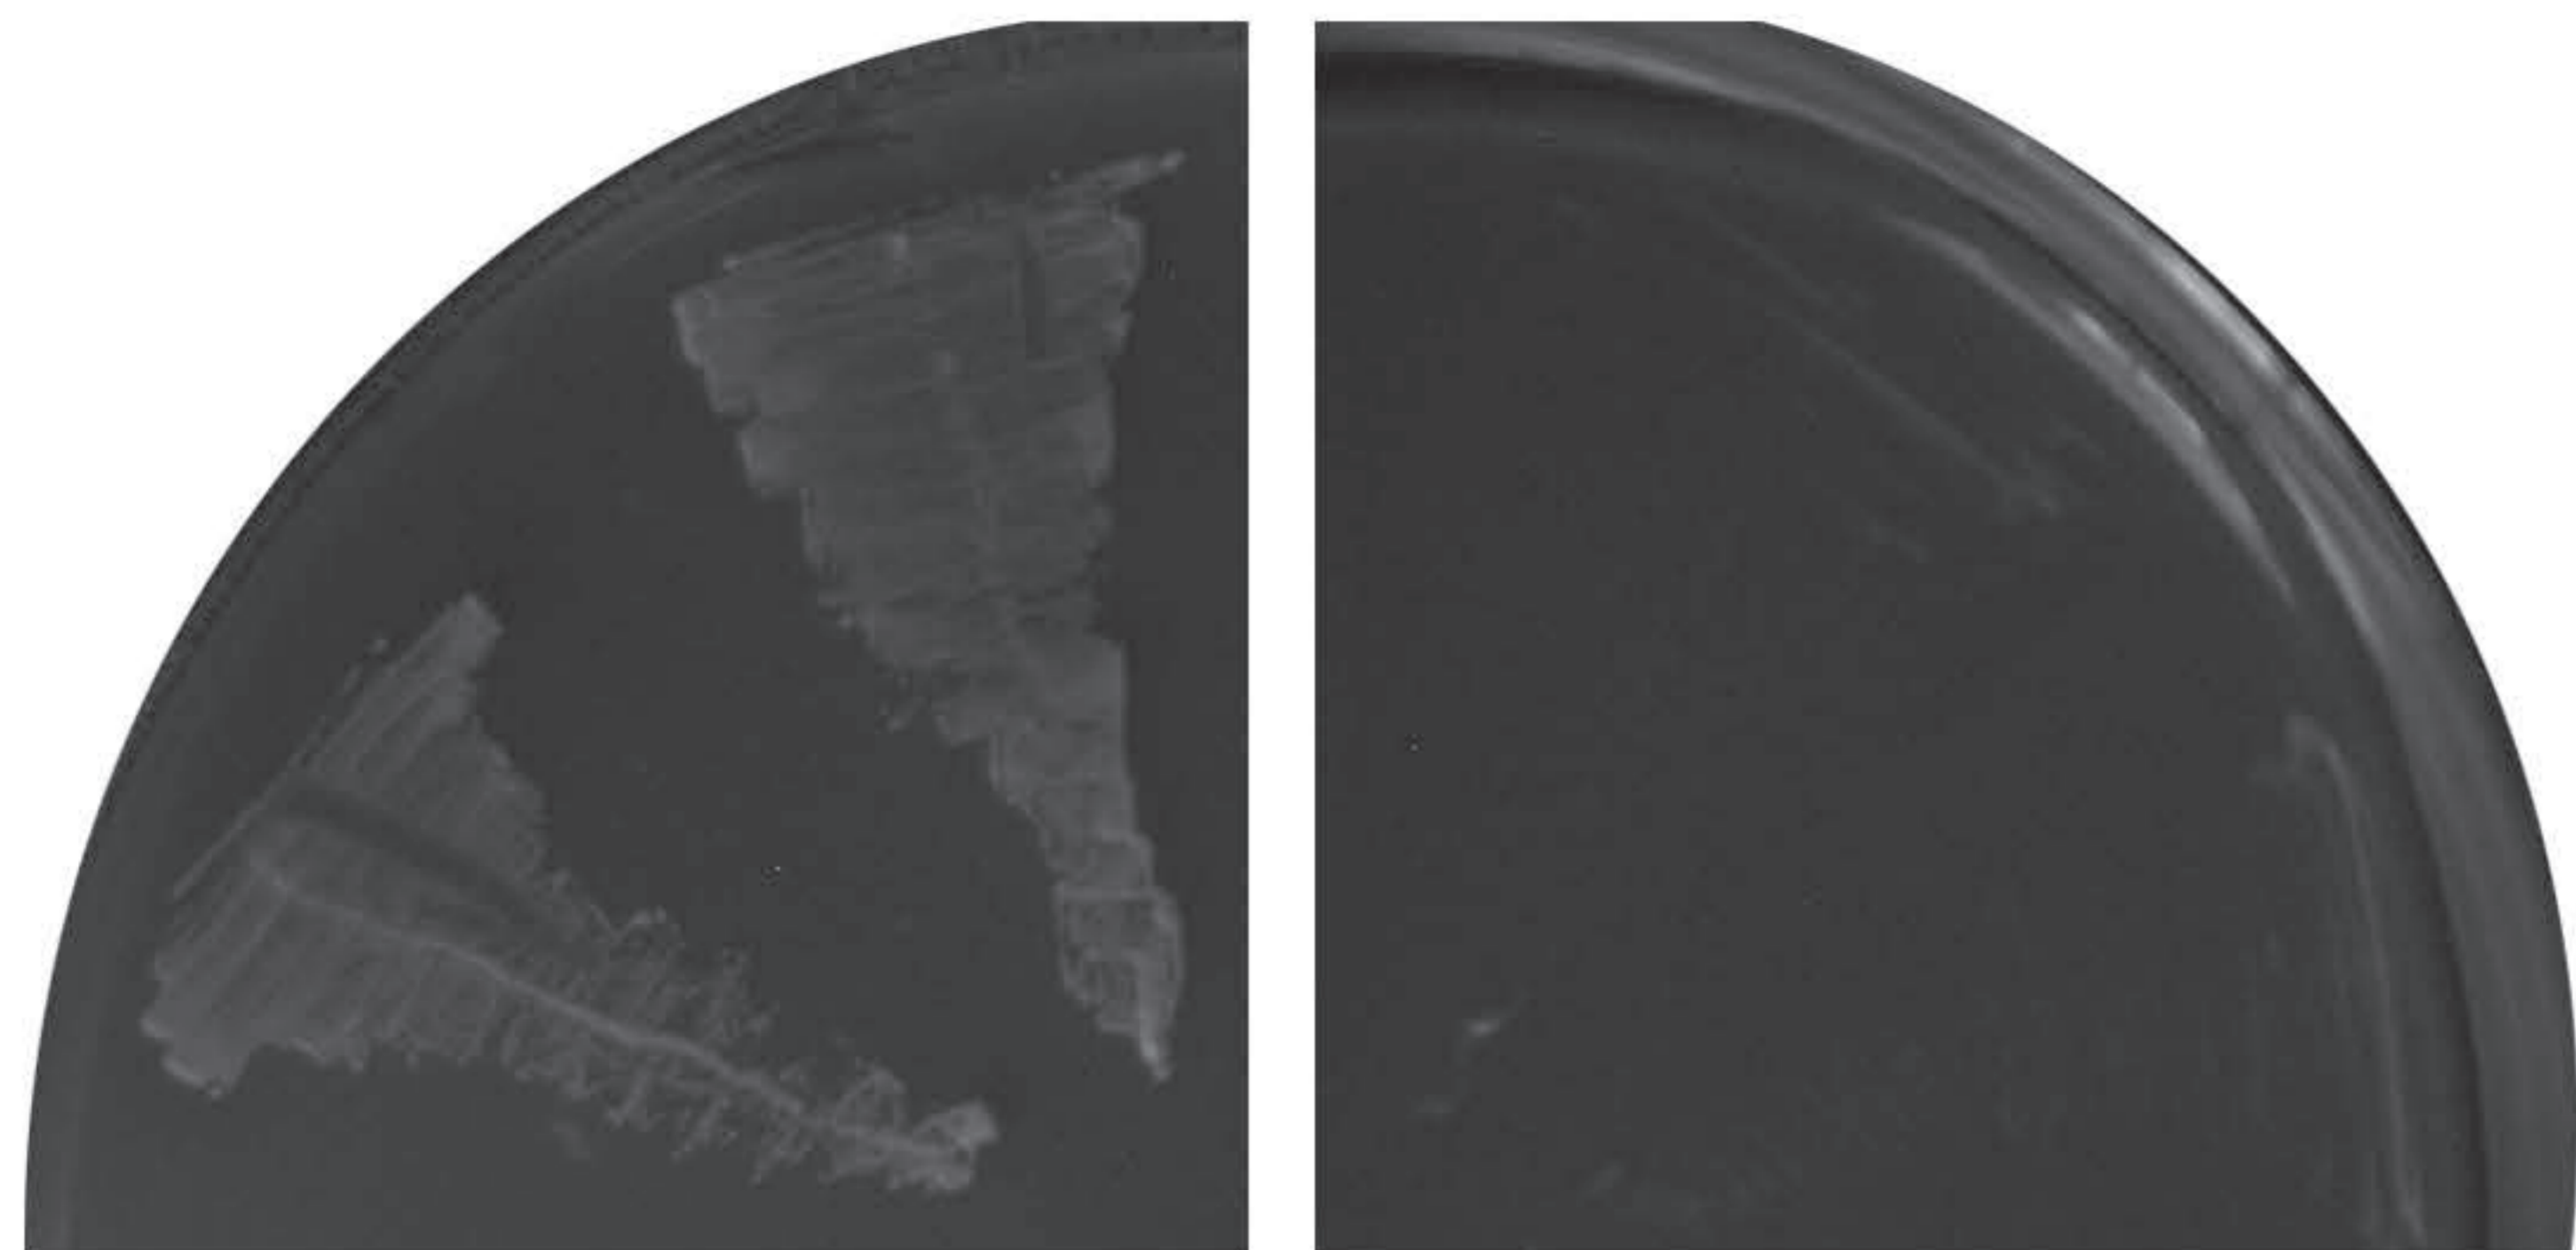

**B**

TEF1 EFL

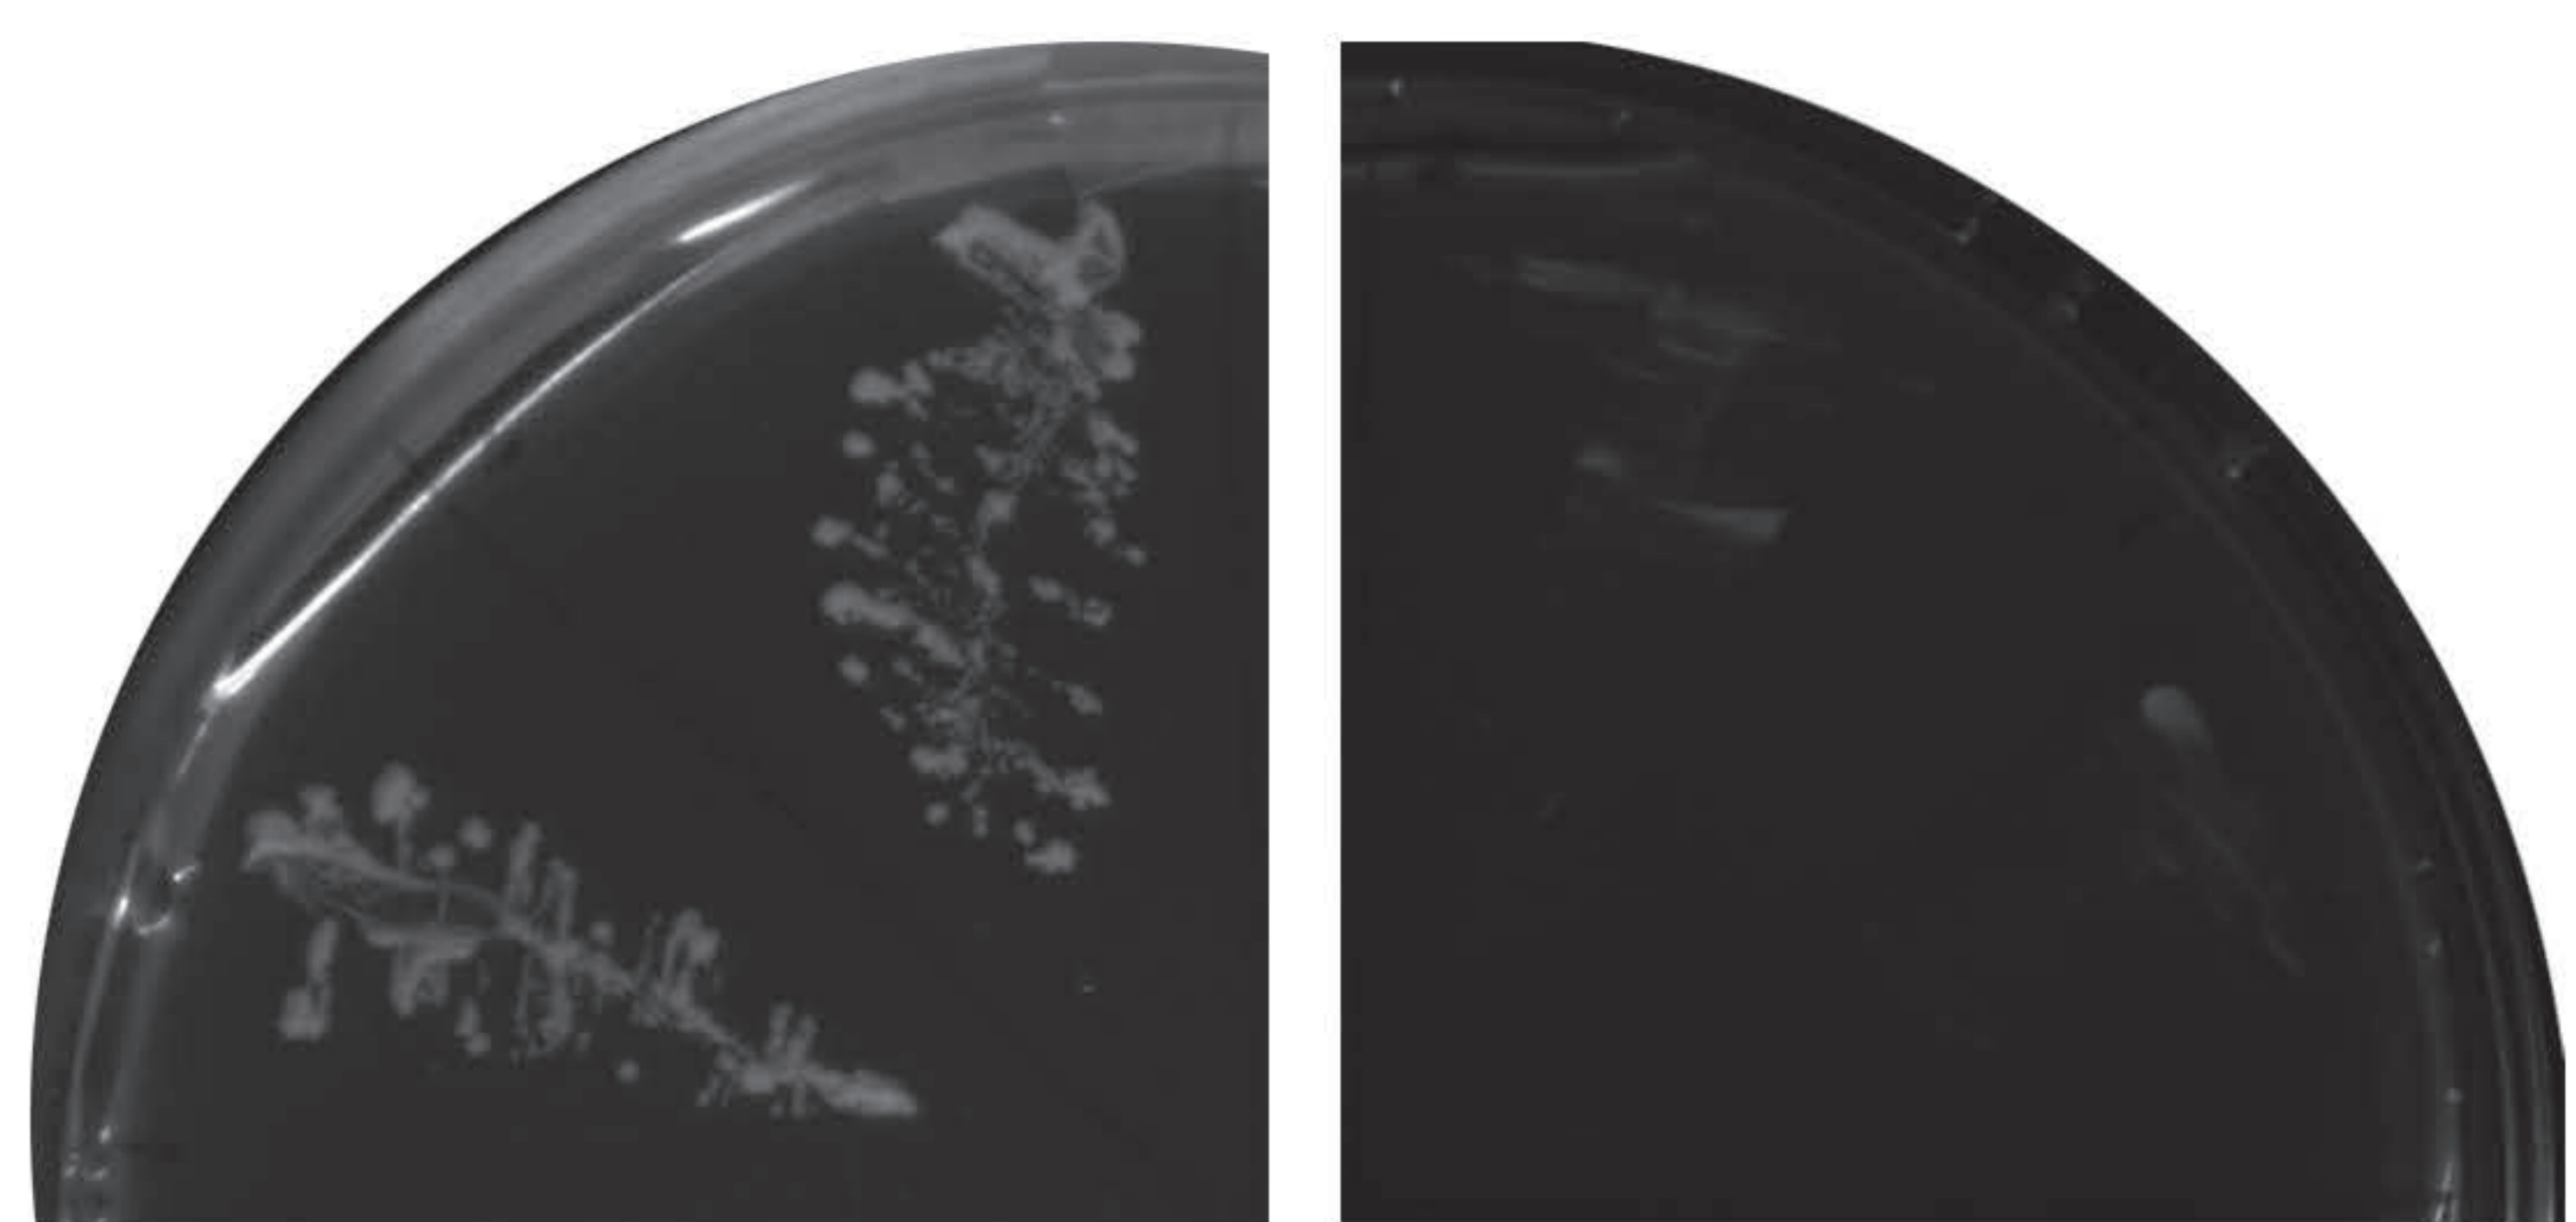

TEF2 EFL

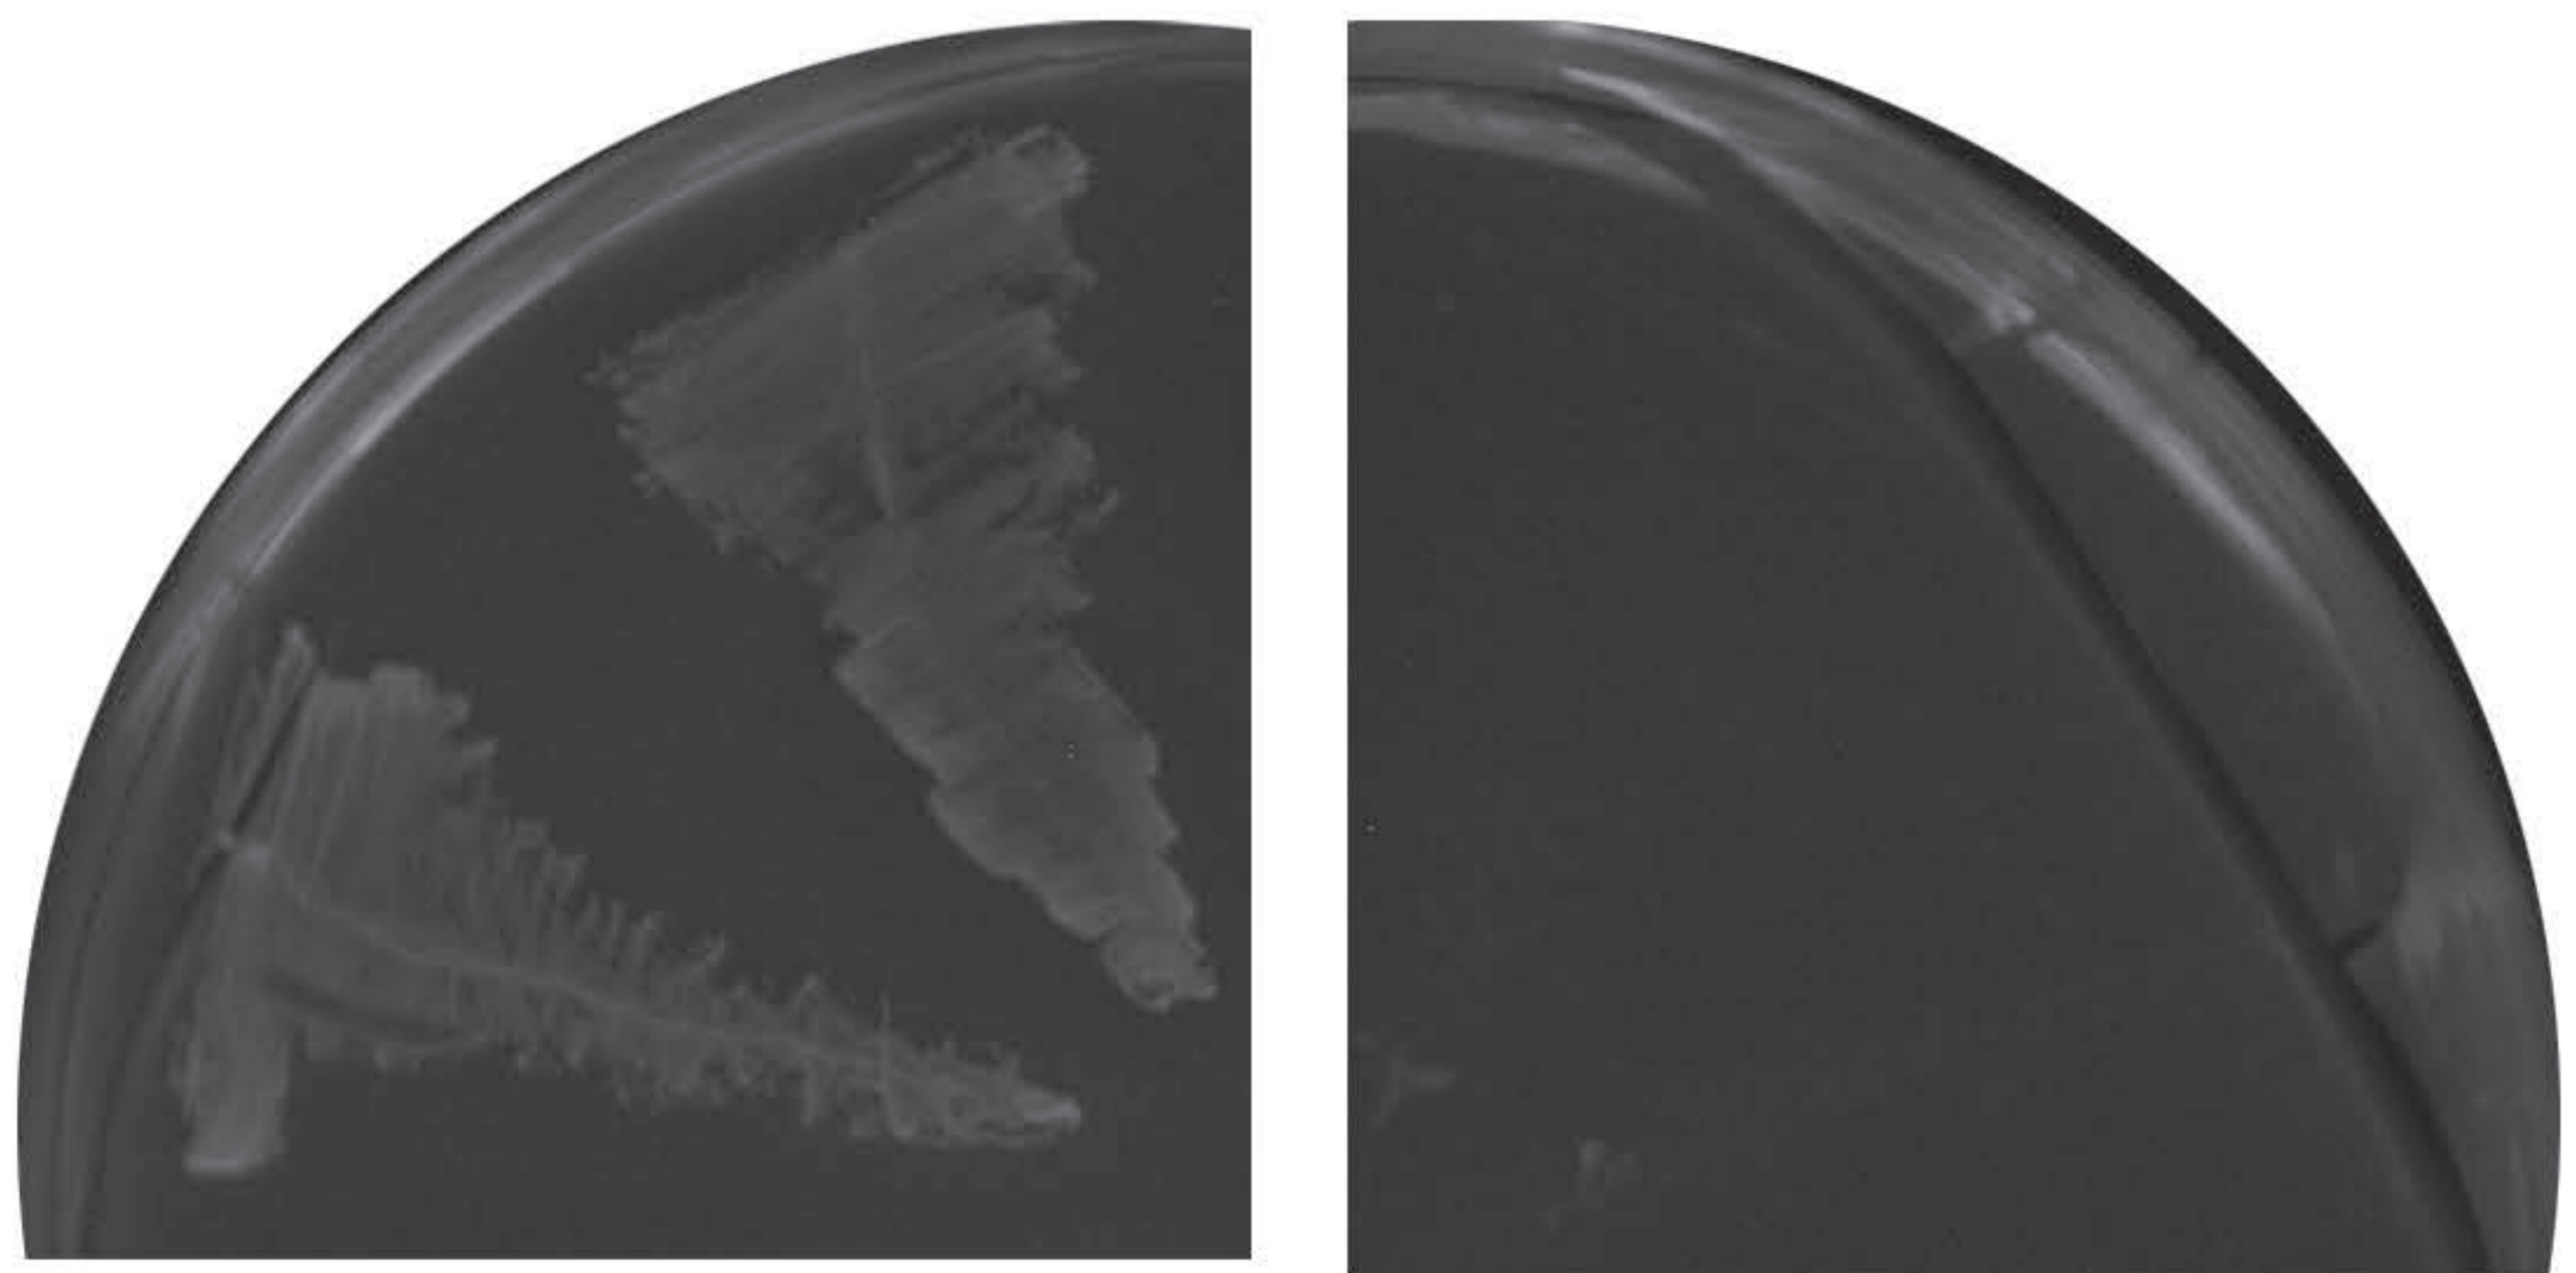

TEF5 EFL

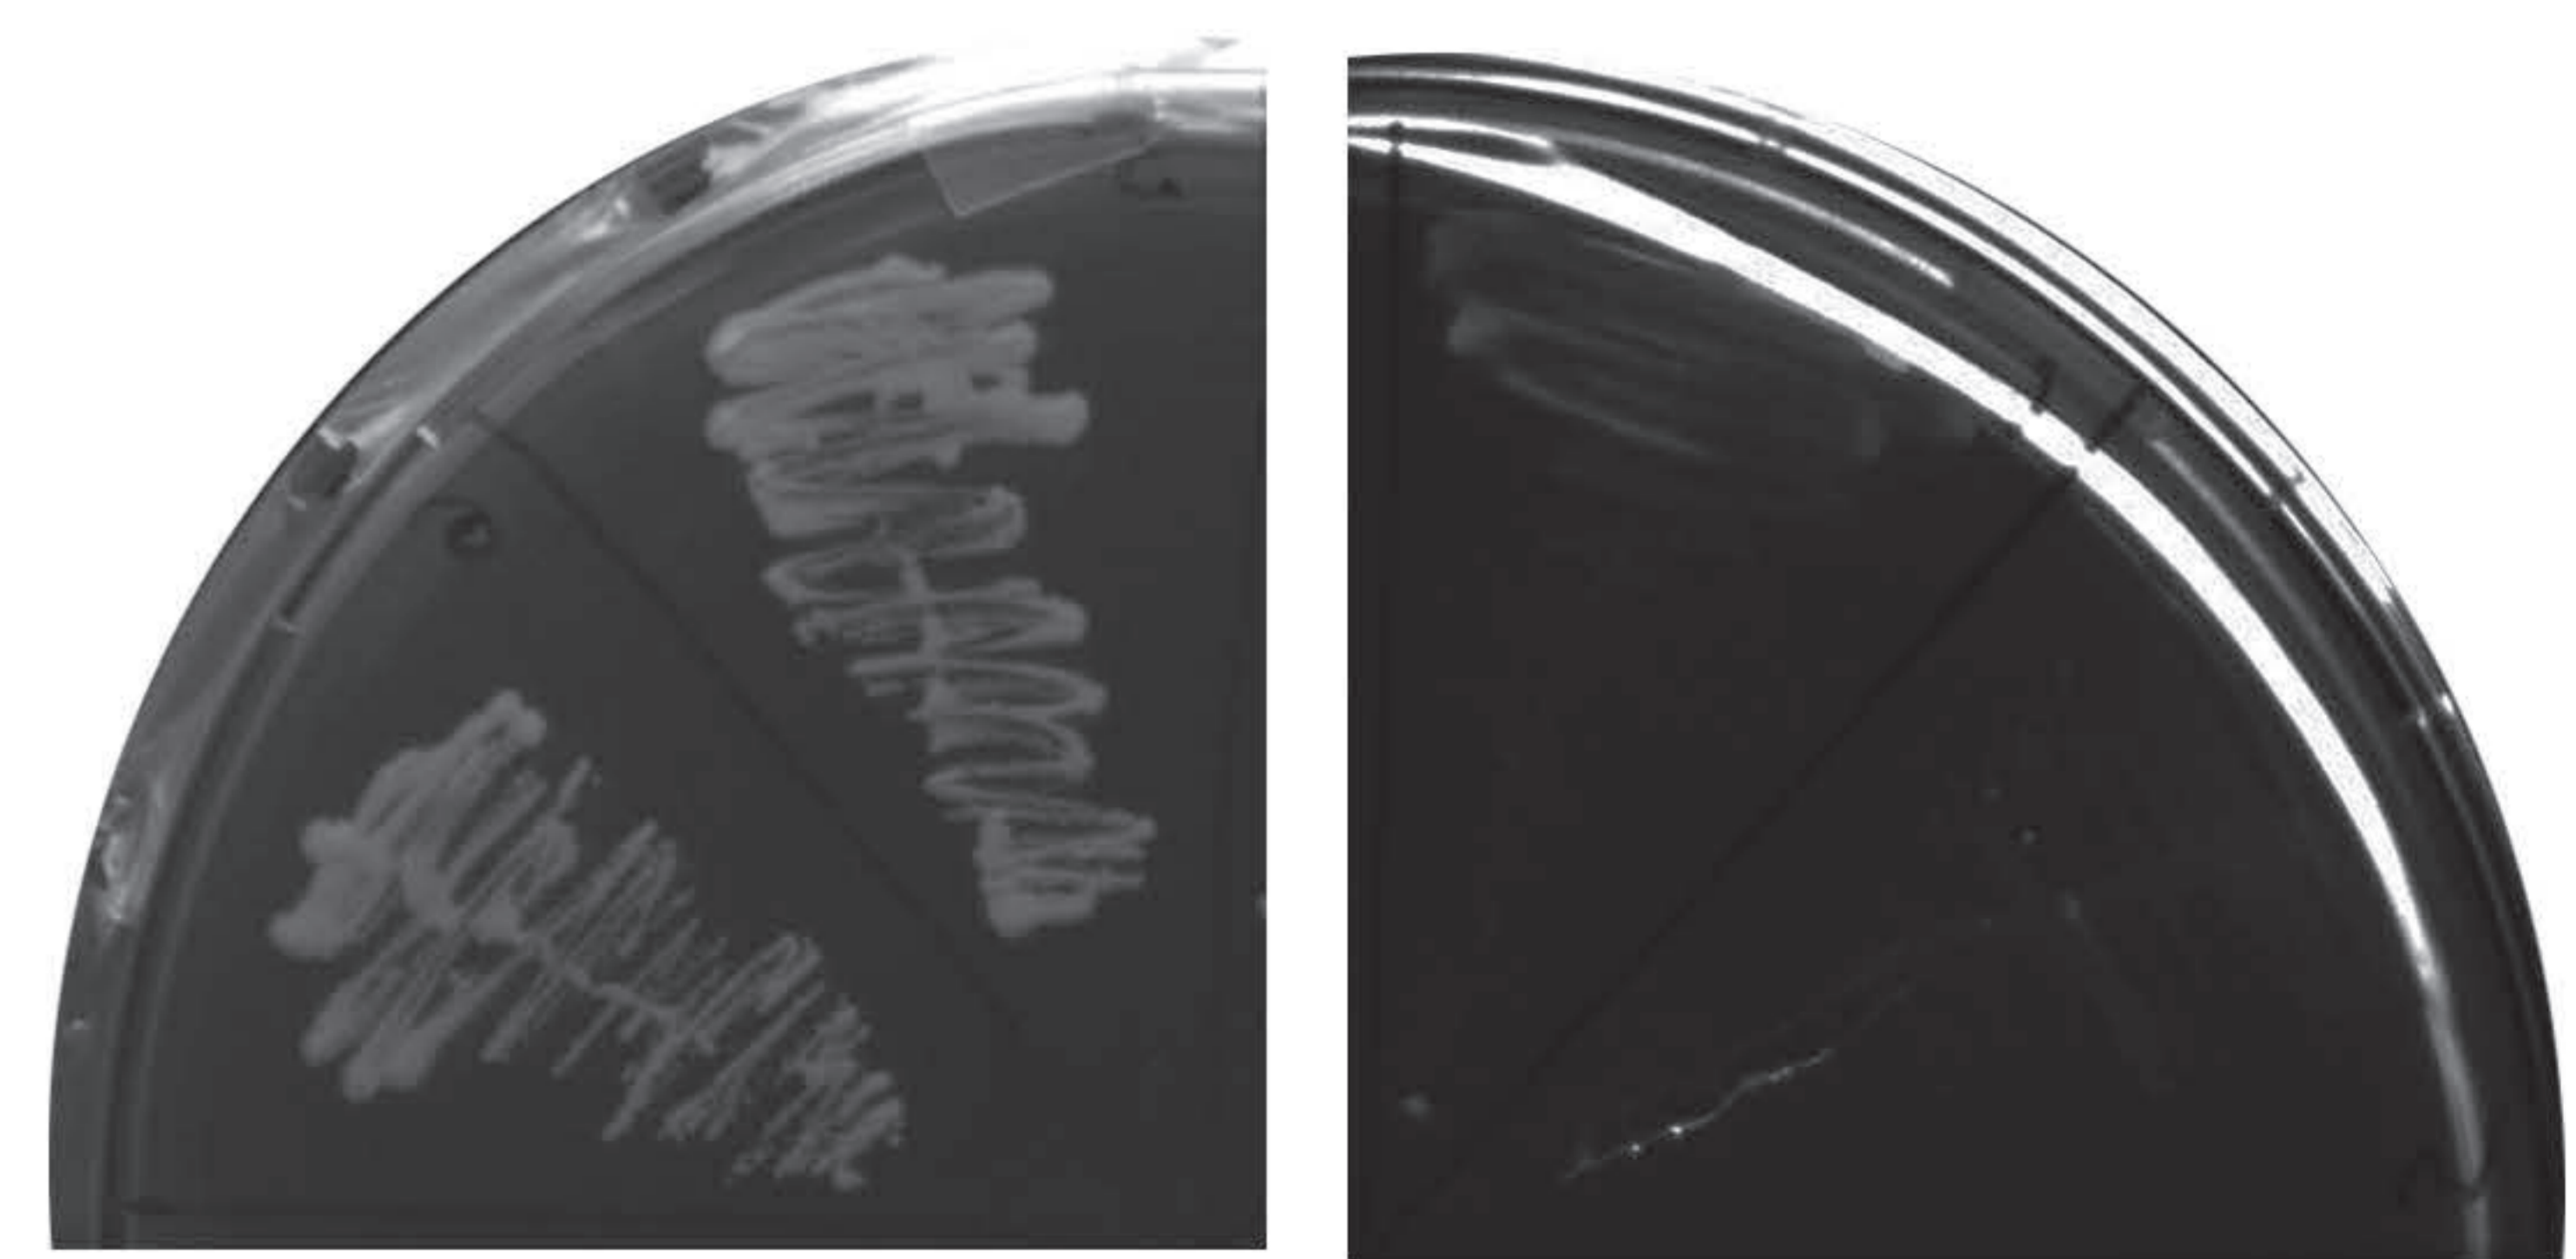

Supplement: 1471-2148-14-35-S4.pdf [file 1471-2148-14-35-S4.pdf]
